# Supplementary material for: Hamiltonian Monte Carlo methods for efficient parameter estimation in steady state dynamical systems
Source: PubMed Central journal article supplement (PMC4262080; doi:10.1186/1471-2105-15-253), 2014-07-28
Supplement: 12859_2014_6684_MOESM1_ESM.pdf [file 12859_2014_6684_MOESM1_ESM.pdf]

**Figure S1. Performance analysis for the original RMHMC for ODE models and two steady state data adapted HMC algorithms**

| $p(\theta)$    | model | size          |                        | Riemannian Manifold            |                                  |                                  | HMC                              |
|----------------|-------|---------------|------------------------|--------------------------------|----------------------------------|----------------------------------|----------------------------------|
|                |       |               |                        | RMHMC                          | NR-RMHMC                         | NR-HMC                           |                                  |
| u              | MAPK  | $2 \times 2$  | $v$ in $s^{-1}$        | $0.312 \pm 0.015$              | $0.811 \pm 0.040$                | $4.19 \pm 0.29$                  | $0.682 \pm 0.088$                |
|                |       |               | $v_r$                  | 1                              | $2.60 \pm 0.25$                  | $13 \pm 2$                       | $2.19 \pm 0.39$                  |
|                |       |               | $\tau_{\text{int.,}L}$ | $1.491 \pm 0.070$              | $1.633 \pm 0.080$                | $3.60 \pm 0.24$                  | $16 \pm 2$                       |
| u              | Mma   | $3 \times 6$  | $v$ in $s^{-1}$        | $(5.8 \pm 1.0) \times 10^{-4}$ | $(1.35 \pm 0.24) \times 10^{-2}$ | $0.376 \pm 0.065$                | $(2.46 \pm 0.86) \times 10^{-2}$ |
|                |       |               | $v_r$                  | 1                              | $23 \pm 8$                       | $640 \pm 230$                    | $42 \pm 22$                      |
|                |       |               | $\tau_{\text{int.,}L}$ | $18 \pm 3$                     | $19 \pm 3$                       | $17 \pm 3$                       | $42 \pm 15$                      |
| u              | Mifa  | $6 \times 14$ | $v$ in $s^{-1}$        | $< 9 \times 10^{-6}$           | $(1.69 \pm 0.25) \times 10^{-2}$ | $(4.92 \pm 0.75) \times 10^{-1}$ | $(5.2 \pm 1.3) \times 10^{-3}$   |
|                |       |               | $v_r$                  | 1                              | $> 1930 \pm 290$                 | $> 55000 \pm 8000$               | $> 580 \pm 150$                  |
|                |       |               | $\tau_{\text{int.,}L}$ | NA                             | $11 \pm 2$                       | $12 \pm 2$                       | $42 \pm 10$                      |
| i              | Mifa  | $6 \times 14$ | $v$ in $s^{-1}$        | NA                             | $(2.36 \pm 0.12) \times 10^{-1}$ | $(1.76 \pm 0.41) \times 10^{-1}$ | $(4.5 \pm 1.3) \times 10^{-3}$   |
|                |       |               | $v_r$                  | NA                             | $52 \pm 18$                      | $39 \pm 20$                      | 1                                |
|                |       |               | $\tau_{\text{int.,}L}$ | NA                             | $0.87 \pm 0.04$                  | $36 \pm 8$                       | $62 \pm 17$                      |
| Newton Raphson |       |               |                        |                                |                                  |                                  |                                  |

The problem size is  $n \times m$ , where  $n$  is the number of state variables and  $m$  the number of parameters. The properties listed are the effective sampling speed  $v$ , relative speed  $v_r$ , and the integrated auto-correlation length  $\tau_{\text{int.,}L}$ . HMC with flat metric (last column) performs less efficient moves through parameter space, which sometimes results in higher auto-correlation. In our examples this efficiency loss is often compensated by lower computational costs. The last example, where we resampled the same  $6 \times 14$  model with an informative prior on half of the parameters, illustrates the advantages of Riemannian manifold methods over their non-Riemannian counterparts: NR-RMHMC is faster than NR-HMC. The sample sizes  $N$  for the various models: (MAPK)  $N = 20000$ , (Mma)  $N = 10000$ , (Mifa)  $N = 10000$ .
